# Supplementary material for: Analysing the effectiveness of Twitter as an equitable community communication tool for international conferences
Source: PeerJ journal article supplement (doi:10.7717/peerj.15270), 2023-05-08
Supplement: tableS1.pdf [file tableS1.pdf]

| Region    | Country     | Region      | Country     | Region        | Country     |
|-----------|-------------|-------------|-------------|---------------|-------------|
| Africa    | Ethiopia    | Europe      | Ireland     | SE Asia       | Bangladesh  |
|           | Ghana       |             | Italy       |               | India       |
|           | Kenya       |             | Jersey      |               | Indonesia   |
|           | Nigeria     |             | Kosovo      |               | Malaysia    |
|           | S Africa    |             | Latvia      |               | Nepal       |
|           | Tanzania    |             | Lithuania   |               | Pakistan    |
|           | Zimbabwe    |             | Luxembourg  |               | Philippines |
|           | Algeria     |             | Malta       |               | Singapore   |
|           | Egypt       |             | Netherlands |               | Sri Lanka   |
|           | Morocco     |             | Norway      |               | Thailand    |
| East Asia | Cambodia    | Poland      | S America   | Vietnam       |             |
|           | China       | Portugal    |             | Argentina     |             |
|           | Hong Kong   | Romania     |             | Brazil        |             |
|           | Japan       | Russia      |             | Chile         |             |
|           | Macao       | San Marino  |             | Colombia      |             |
|           | S Korea     | Serbia      |             | Dom. Republic |             |
| Europe    | Taiwan      | Slovakia    | West Asia   | Ecuador       |             |
|           | Austria     | Slovenia    |             | Peru          |             |
|           | Belgium     | Spain       |             | Uruguay       |             |
|           | Bosnia      | Sweden      |             | Venezuela     |             |
|           | Bulgaria    | Switzerland |             | Iran          |             |
|           | Croatia     | UK          |             | Iraq          |             |
|           | Cyprus      | Ukraine     |             | Israel        |             |
|           | Czechia     | N America   |             | Canada        | Kazakhstan  |
|           | Denmark     |             |             | Costa Rica    | Kuwait      |
|           | Estonia     | Cuba        |             | Lebanon       |             |
|           | Finland     | Mexico      |             | Oman          |             |
|           | France      | Puerto Rico |             | Qatar         |             |
|           | Germany     | USA         |             | Saudi Arabia  |             |
|           | Greece      | Oceania     |             | Australia     | Turkey      |
| Hungary   | New Zealand |             | UAE         |               |             |
| Iceland   |             |             |             |               |             |

Table S1: Region assignment for each country.
