# Supplementary material for: Analysing the effectiveness of Twitter as an equitable community communication tool for international conferences
Source: PeerJ journal article supplement (doi:10.7717/peerj.15270), 2023-05-08
Supplement: tableS2.pdf [file tableS2.pdf]

| Journal                   | Publications | With location | Excluded |
|---------------------------|--------------|---------------|----------|
| <i>eNeuro</i>             | 1581         | 1436          | 9.2%     |
| <i>Eur J Neurosci</i>     | 4019         | 3930          | 2.2%     |
| <i>Front Hum Neurosci</i> | 6390         | 6318          | 1.1%     |
| <i>Front Neurosci</i>     | 7042         | 7019          | 0.3%     |
| <i>Hum Brain Mapp</i>     | 3692         | 3638          | 1.5%     |
| <i>J Neurosci</i>         | 14796        | 13176         | 10.9%    |
| <i>Magn Reson Med</i>     | 5196         | 5162          | 0.7%     |
| <i>NeuroImage</i>         | 10970        | 10804         | 1.5%     |

Table S2: Publications with location information from each journal.
