# Supplementary material for: Analysing the effectiveness of Twitter as an equitable community communication tool for international conferences
Source: PeerJ journal article supplement (doi:10.7717/peerj.15270), 2023-05-08
Supplement: tableS3.pdf [file tableS3.pdf]

| Country                | Users |
|------------------------|-------|
| Bosnia and Herzegovina | 2     |
| Cambodia               | 1     |
| Costa Rica             | 1     |
| Ecuador                | 1     |
| Ghana                  | 1     |
| Jersey                 | 1     |
| Latvia                 | 1     |
| Macao                  | 1     |
| Nepal                  | 2     |
| Peru                   | 1     |
| Puerto Rico            | 9     |

Table S3: Countries with Twitter users but no publications.
